# Supplementary material
Source: Research Square preprint supplement (doi:10.21203/rs.3.rs-7209554/v1)
Supplement: Supplementary file 1 [file 52d6ff529eaf444fd436db9c.xlsx]

## Sheet: Table_13_2__Data_Sources_and_Co
Comparative Policy Corpus on Scientific Data Governance and Security in China and the United States
.Short ID	Document Title	Issuing Authority	Level of Authority	Year	Country	URL	Link checked on
CN-01	Administrative Measures for Scientific Data of the "Xihe" Satellite	China National Space Administration	Departmental Rules	2022	China	http://www.scio.gov.cn/xwfb/gwyxwbgsxwfbh/wqfbh_2284/2022n_2285/49347/xgzc49353/202307/t20230713_727864.html	2025-08-24
CN-02	Outline of the 14th Five-Year Plan (2021-2025) for National Economic and Social Development and Vision 2035 of the People's Republic of China	National People's Congress	Working Documents	2021	China	https://www.gov.cn/xinwen/2021-03/13/content_5592681.htm	2025-08-24
CN-03	Data Security Law of the People's Republic of China	Standing Committee of the National People's Congress	Laws	2021	China	https://www.gov.cn/xinwen/2021-06/11/content_5616919.htm	2025-08-24
CN-04	CAS Administrative Measures for the Management and Open Sharing of Scientific Data (Trial)	Chinese Academy of Sciences	Departmental Rules	2019	China	https://www.cas.cn/glzdyzc/kxsjyxxh/kxsj/202308/t20230807_4960068.shtml	2025-08-24
CN-05	Implementation Plan for Improving Data Circulation Security Governance to Enhance the Marketization and Value Realization of Data Elements	National Development & Reform Commission et al	Departmental Working Documents	2025	China	https://www.gov.cn/zhengce/zhengceku/202501/content_6998668.htm	2025-08-24
CN-06	Measures for the Management of Scientific Data	General Office of the State Council	Regulatory Documents of the State Council	2018	China	https://www.gov.cn/zhengce/zhengceku/2018-04/02/content_5279272.htm	2025-08-24
CN-07	Interim Measures for the Administration of International Cooperation on National Civil Satellite Remote Sensing Data	China National Space Administration	Departmental Rules	2022	China	https://www.gov.cn/zhengce/zhengceku/2022-05/05/content_5688668.htm	2025-08-24
CN-08	Regulation on the National Natural Science Funds	State Council	Administrative Regulations	2024	China	https://www.gov.cn/zhengce/zhengceku/202411/content_6986948.htm	2025-08-24
CN-09	Measures for the Security Assessment of Outbound Data Transfer	Cyberspace Administration of China	Departmental Rules	2022	China	https://www.gov.cn/gongbao/content/2022/content_5707283.htm	2025-08-24
CN-10	Detailed Rules for International Cooperation on Lunar Samples and Scientific Data	China National Space Administration	Departmental Rules	2023	China	https://www.gov.cn/lianbo/bumen/202308/content_6896933.htm	2025-08-24
CN-11	Measures for the Administration of Monitoring of Earthquakes at Reservoirs	China Earthquake Administration	Departmental Rules	2011	China	https://www.cea.gov.cn/cea/zwgk/5616193/5614278/5616384/5616407/index.html	2025-08-24
CN-12	Several Provisions on the Management of Automobile Data Security	Cyberspace Administration of China	Departmental Rules	2021	China	https://www.gov.cn/zhengce/2021-08/20/content_5728943.htm	2025-08-24
CN-13	Administrative Measures for Scientific Data of the “Macao Science 1” Satellite	China National Space Administration	Departmental Rules	2023	China	https://www.cnsa.gov.cn/n6758823/n6758839/c10066120/content.html	2025-08-24
CN-14	Regulations on the Confidentiality of Science and Technology	Ministry of Science and Technology	Departmental Rules	2015	China	https://www.gjbmj.gov.cn/n1/2017/0209/c409089-29070219.html	2025-08-24
CN-15	Regulation on Network Data Security Management	State Council	Administrative Regulations	2024	China	https://www.gov.cn/zhengce/content/202409/content_6977766.htm	2025-08-24
CN-16	Administrative Measures for Data Security in the Field of Natural Resources	Ministry of Natural Resources	Departmental Regulatory Documents	2024	China	https://gk.mnr.gov.cn/zc/qtwj/202403/t20240329_2840971.html	2025-08-24
CN-17	Administrative Measures for the National Science and Technology Resource Sharing Service Platform (Trial)	Ministry of Science and Technology	Departmental Rules	2018	China	https://www.most.gov.cn/xxgk/xinxifenlei/fdzdgknr/fgzc/gfxwj/gfxwj2018/201802/t20180224_138207.html	2025-08-24
CN-18	Measures for the Management of Scientific Data from Lunar and Deep Space Exploration Projects	State Administration of Science, Technology and Industry for National Defense (SASTIND) & China National Space Administration (CNSA)	Departmental Rules	2016	China	https://www.sastind.gov.cn/n10086167/n10086221/c10129407/content.html	2025-08-24
US-01	U.S. 2021 Federal Data Strategy Action Plan	Office of Management and Budget (OMB)	Departmental Rules	2021	United States	https://strategy.data.gov/assets/docs/2021-Federal-Data-Strategy-Action-Plan.pdf	2025-08-24
US-02	U.S. Cybersecurity Information Sharing Act	U.S. Congress	Laws	2015	United States	https://www.cisa.gov/sites/default/files/publications/Cybersecurity%2520Information%2520Sharing%2520Act%2520of%25202015.pdf	2025-08-24
US-03	U.S. Department of Energy (DOE) Public Access Plan	Department of Energy (DOE)	Departmental Regulatory Documents	2023	United States	https://www.energy.gov/sites/default/files/2023-06/doe-public-access-plan-2023.pdf	2025-08-24
US-04	U.S. Executive Order on Improving the Nation’s Cybersecurity	The White House	Administrative Regulations	2021	United States	https://www.cisa.gov/topics/cybersecurity-best-practices/executive-order-improving-nations-cybersecurity	2025-08-24
US-05	U.S. Federal Cybersecurity Enhancement Act	U.S. Congress	Laws	2015	United States	https://www.cbo.gov/publication/51147	2025-08-24
US-06	U.S. Foundations for Evidence Based Policymaking Act	U.S. Congress	Laws	2019	United States	https://www.congress.gov/bill/115th-congress/house-bill/4174	2025-08-24
US-07	U.S. National Artificial Intelligence Initiative Act	U.S. Congress	Laws	2020	United States	https://www.uspto.gov/sites/default/files/documents/National-Artificial-Intelligence-Initiative-Overview.pdf	2025-08-24
US-08	U.S. National Strategy for Critical and Emerging Technologies	White House Office of Science and Technology Policy (OSTP)	Departmental Rules	2020	United States	https://trumpwhitehouse.archives.gov/wp-content/uploads/2020/10/National-Strategy-for-CET.pdf	2025-08-24
US-09	U.S. National Strategy for Trusted Identities in Cyberspace	National Institute of Standards and Technology (NIST)	Departmental Rules	2011	United States	https://obamawhitehouse.archives.gov/sites/default/files/rss_viewer/NSTICstrategy_041511.pdf	2025-08-24
US-10	U.S. National Cybersecurity Strategy	White House National Security Council (NSC)	Departmental Rules	2023	United States	https://bidenwhitehouse.archives.gov/wp-content/uploads/2023/03/National-Cybersecurity-Strategy-2023.pdf	2025-08-24
US-11	U.S. National Security Strategy	White House National Security Council (NSC)	Departmental Working Documents	2022	United States	https://bidenwhitehouse.archives.gov/wp-content/uploads/2022/10/Biden-Harris-Administrations-National-Security-Strategy-10.2022.pdf	2025-08-24
US-12	U.S. NIST Big Data Interoperability Framework (NBDIF)	National Institute of Standards and Technology (NIST)	Departmental Rules	2019	United States	https://www.nist.gov/itl/big-data-nist/big-data-nist-documents/nbdif-version-30-final	2025-08-24
US-13	U.S. NIST Privacy Framework A Tool for Improving Privacy through Enterprise Risk Management	National Institute of Standards and Technology (NIST)	Departmental Regulatory Documents	2020	United States	https://www.nist.gov/system/files/documents/2020/01/16/NIST%20Privacy%20Framework_V1.0.pdf	2025-08-24
US-14	U.S. OMB Circular A 130: Managing Information as a Strategic Resource	Office of Management and Budget (OMB)	Departmental Regulatory Documents	2016	United States	https://obamawhitehouse.archives.gov/sites/default/files/omb/assets/OMB/circulars/a130/a130revised.pdf	2025-08-24
US-15	U.S. Open Government Directive	Office of Management and Budget (OMB)	Departmental Rules	2009	United States	https://obamawhitehouse.archives.gov/open/documents/open-government-directive	2025-08-24
US-16	U.S. OSTP Memo Ensuring Free, Immediate, and Equitable Access to Federally Funded Research	Office of Science and Technology Policy (OSTP)	Departmental Working Documents	2022	United States	https://bidenwhitehouse.archives.gov/wp-content/uploads/2022/08/08-2022-OSTP-Public-Access-Memo.pdf	2025-08-24
US-17	U.S. OSTP Public Access Policy	Office of Science and Technology Policy (OSTP)	Departmental Regulatory Documents	2013	United States	https://obamawhitehouse.archives.gov/sites/default/files/microsites/ostp/ostp_public_access_memo_2013.pdf	2025-08-24
US-18	U.S. CHIPS and Science Act	U.S. Congress	Laws	2022	United States	https://www.congress.gov/bill/117th-congress/house-bill/4346	2025-08-24
